# Supplementary material
Source: PubMed Central journal article supplement (PMC4237978)
Supplement: supp_dc14-0523v140523_DC140523SupplementaryData.pdf [file supp_dc14-0523v140523_DC140523SupplementaryData.pdf]

SUPPLEMENTARY DATA

**Supplementary Table 1.** Hazard ratio of cancer according to different levels of serum high-density lipoprotein (HDL) cholesterol during follow-up among various subpopulations of diabetic patients

|                             | HDL cholesterol (mg/dL) |                    |                    |                    |                    |                    |                    | P for trend | P for interaction |
|-----------------------------|-------------------------|--------------------|--------------------|--------------------|--------------------|--------------------|--------------------|-------------|-------------------|
|                             | <30                     | 30-39.9            | 40-49.9            | 50-59.9            | 60-69.9            | 70-79.9            | ≥80                |             |                   |
| Race                        |                         |                    |                    |                    |                    |                    |                    |             | >0.50             |
| Black                       | 1.00                    | 0.91 (0.76 - 1.09) | 1.03 (0.86 - 1.23) | 0.86 (0.71 - 1.05) | 0.71 (0.56 - 0.91) | 0.83 (0.60 - 1.15) | 0.70 (0.47 - 1.04) | 0.003       |                   |
| White                       | 1.00                    | 0.90 (0.78 - 1.03) | 0.86 (0.74 - 1.01) | 0.81 (0.66 - 0.98) | 0.69 (0.52 - 0.93) | 0.81 (0.51 - 1.29) | 0.99 (0.57 - 1.74) | 0.019       |                   |
| Body mass index             |                         |                    |                    |                    |                    |                    |                    |             | 0.001             |
| <30                         | 1.00                    | 0.83 (0.70 - 0.99) | 0.83 (0.69 - 0.99) | 0.75 (0.61 - 0.92) | 0.55 (0.42 - 0.73) | 0.66 (0.47 - 0.93) | 0.69 (0.47 - 1.02) | <0.001      |                   |
| ≥30                         | 1.00                    | 0.95 (0.82 - 1.10) | 1.02 (0.88 - 1.18) | 0.89 (0.74 - 1.06) | 0.83 (0.65 - 1.07) | 1.00 (0.68 - 1.48) | 0.76 (0.43 - 1.33) | 0.013       |                   |
| Smoking                     |                         |                    |                    |                    |                    |                    |                    |             | >0.75             |
| Never                       | 1.00                    | 0.92 (0.80 - 1.06) | 0.93 (0.80 - 1.07) | 0.84 (0.71 - 0.99) | 0.68 (0.55 - 0.86) | 0.97 (0.73 - 1.29) | 0.78 (0.53 - 1.14) | 0.007       |                   |
| Current                     | 1.00                    | 0.84 (0.70 - 1.01) | 0.95 (0.78 - 1.14) | 0.80 (0.62 - 1.02) | 0.69 (0.49 - 0.96) | 0.37 (0.19 - 0.73) | 0.68 (0.38 - 1.21) | 0.001       |                   |
| Glucose-lowering medication |                         |                    |                    |                    |                    |                    |                    |             | >0.50             |
| No use                      | 1.00                    | 0.84 (0.71 - 1.00) | 0.83 (0.69 - 0.99) | 0.79 (0.65 - 0.97) | 0.62 (0.48 - 0.82) | 0.66 (0.46 - 0.97) | 0.66 (0.43 - 1.02) | 0.009       |                   |
| Use                         | 1.00                    | 0.94 (0.82 - 1.09) | 1.02 (0.88 - 1.18) | 0.86 (0.72 - 1.03) | 0.75 (0.58 - 0.96) | 0.94 (0.66 - 1.34) | 0.84 (0.52 - 1.34) | 0.011       |                   |
| Lipid-lowering medication   |                         |                    |                    |                    |                    |                    |                    |             | >0.05             |
| No use                      | 1.00                    | 0.86 (0.72 - 1.03) | 0.84 (0.70 - 1.02) | 0.73 (0.59 - 0.91) | 0.69 (0.52 - 0.90) | 0.79 (0.55 - 1.13) | 0.77 (0.51 - 1.18) | 0.001       |                   |
| Use                         | 1.00                    | 0.93 (0.81 - 1.07) | 1.00 (0.87 - 1.16) | 0.91 (0.76 - 1.08) | 0.68 (0.53 - 0.87) | 0.80 (0.55 - 1.17) | 0.68 (0.42 - 1.12) | 0.052       |                   |

Adjusted for age, gender, race, body mass index, systolic blood pressure, LDL cholesterol, type of insurance, income, smoking, use of antihypertensive drugs, use of diabetes medications, and use of cholesterol-lowering agents.

SUPPLEMENTARY DATA

**Supplementary Table 2.** Hazard ratio of subtypes of cancer according to different levels of serum high-density lipoprotein (HDL) cholesterol at baseline among diabetic patients

| Subtypes of cancer | HDL cholesterol (mg/dL) |                  |                  |                  |                  |                  | P for trend |
|--------------------|-------------------------|------------------|------------------|------------------|------------------|------------------|-------------|
|                    | <30                     | 30-39.9          | 40-49.9          | 50-59.9          | 60-69.9          | ≥70              |             |
| Lung               | 1.00                    | 0.86 (0.62-1.19) | 0.81 (0.58-1.14) | 0.48 (0.31-0.75) | 0.41 (0.22-0.77) | 0.33 (0.15-0.73) | <0.001      |
| Stomach            | 1.00                    | 0.55 (0.24-1.26) | 0.23 (0.08-0.62) | 0.34 (0.12-1.01) | 0.58 (0.17-1.99) | -                | 0.028       |
| Liver              | 1.00                    | 0.41 (0.21-0.78) | 0.55 (0.30-1.03) | 0.66 (0.33-1.34) | 0.64 (0.26-1.60) | 0.53 (0.17-1.63) | 0.79        |
| Colon              | 1.00                    | 0.70 (0.51-0.97) | 0.62 (0.45-0.87) | 0.82 (0.57-1.17) | 0.70 (0.44-1.13) | 0.68 (0.39-1.21) | 0.42        |
| Rectum             | 1.00                    | 0.86 (0.51-1.46) | 0.89 (0.52-1.52) | 1.49 (0.85-2.61) | 1.01 (0.47-2.16) | 0.88 (0.35-2.25) | 0.28        |
| Prostate (male)    | 1.00                    | 1.28 (0.94-1.74) | 1.44 (1.04-2.00) | 1.30 (0.86-1.96) | 1.19 (0.64-2.21) | 0.75 (0.30-1.91) | 0.51        |
| Breast (female)    | 1.00                    | 1.24 (0.88-1.75) | 1.02 (0.72-1.44) | 0.99 (0.68-1.43) | 0.99 (0.64-1.52) | 0.86 (0.52-1.42) | 0.070       |
| Cervix (female)    | 1.00                    | 0.93 (0.47-1.82) | 0.85 (0.43-1.68) | 0.76 (0.36-1.62) | 1.03 (0.44-2.45) | 0.16 (0.02-1.27) | 0.21        |
| Others             | 1.00                    | 0.83 (0.71-0.98) | 0.80 (0.68-0.95) | 0.74 (0.61-0.90) | 0.63 (0.48-0.83) | 0.72 (0.52-1.00) | 0.001       |

Adjusted for age, race, body mass index, systolic blood pressure, HbA1c, LDL cholesterol, triglycerides, type of insurance, family income, smoking, use of antihypertensive drugs, use of diabetes medications, and use of cholesterol-lowering agents.
